# Supplementary material
Source: PubMed Central journal article supplement (PMC1691163)
Supplement: 12495497s01.pdf [file 12495497s01.pdf]

These are electronic appendices to the paper by Gage *et al.* 2002 Sexual selection and speciation in mammals, butterflies and spiders. *Proc. R. Soc. Lond. B* **269**, 2309-2316.

Electronic appendices are refereed with the text. However, no attempt has been made to impose a uniform editorial style on the electronic appendices

Appendix A. Data for 480 mammal genera on mean male and female body mass (grams), speciosity (=number of species per genus), testes mass (milligrams) and body mass (grams) from the testes mass sources.

| GENUS                 | MALE MASS | FEMALE MASS | SPECIOSITY | TESTES MASS | BODY MASS (TESTES) |
|-----------------------|-----------|-------------|------------|-------------|--------------------|
| <i>Acinonyx</i>       | 53900     | 43000       | 1          | -           | -                  |
| <i>Acomys</i>         | 30        | 34          | 9          | -           | -                  |
| <i>Aconaemys</i>      | 133       | 134         | 2          | -           | -                  |
| <i>Acrobates</i>      | 14        | 14          | 1          | -           | -                  |
| <i>Aepyceros</i>      | 58200     | 45000       | 1          | 120000      | 62500              |
| <i>Aepyprymnus</i>    | 3000      | 3500        | 1          | -           | -                  |
| <i>Aethomys</i>       | 35        | 33          | 9          | -           | -                  |
| <i>Ailurus</i>        | 5400      | 5400        | 1          | -           | -                  |
| <i>Akodon</i>         | 36        | 28          | 46         | -           | -                  |
| <i>Alcelaphus</i>     | 150000    | 120000      | 1          | 107000      | 132000             |
| <i>Alces</i>          | 261000    | 190000      | 1          | 106000      | 789000             |
| <i>Allactaga</i>      | 63        | 74          | 11         | -           | -                  |
| <i>Alouatta</i>       | 7060      | 5140        | 6          | 18200       | 7600               |
| <i>Amblysomus</i>     | 46        | 44          | 4          | -           | -                  |
| <i>Ametrida</i>       | 8         | 10          | 1          | -           | -                  |
| <i>Ammodorcas</i>     | 29500     | 22700       | 1          | -           | -                  |
| <i>Anisomys</i>       | 508       | 513         | 1          | -           | -                  |
| <i>Anoura</i>         | 14        | 13          | 4          | -           | -                  |
| <i>Anourosorex</i>    | 19        | 20          | 1          | -           | -                  |
| <i>Antechinomys</i>   | 30        | 20          | 1          | -           | -                  |
| <i>Antechinus</i>     | 62        | 40          | 10         | 240         | 10                 |
| <i>Antidorcas</i>     | 41000     | 37100       | 1          | 71000       | 35000              |
| <i>Antilope</i>       | 38100     | 35300       | 1          | 26000       | 35000              |
| <i>Aonyx</i>          | 13100     | 12400       | 3          | -           | -                  |
| <i>Aplodontia</i>     | 1130      | 1070        | 1          | -           | -                  |
| <i>Apodemus</i>       | 22        | 20          | 14         | -           | -                  |
| <i>Arctocephalus</i>  | 183000    | 59700       | 8          | -           | -                  |
| <i>Artibeus</i>       | 30        | 30          | 19         | -           | -                  |
| <i>Arvicanthis</i>    | 45        | 40          | 5          | -           | -                  |
| <i>Arvicola</i>       | 311       | 272         | 2          | -           | -                  |
| <i>Asellia</i>        | 11        | 8           | 2          | -           | -                  |
| <i>Atelerix</i>       | 358       | 261         | 4          | -           | -                  |
| <i>Atherurus</i>      | 3430      | 3180        | 2          | -           | -                  |
| <i>Atilax</i>         | 3400      | 3400        | 1          | -           | -                  |
| <i>Auliscomys</i>     | 62        | 65          | 4          | -           | -                  |
| <i>Balaena</i>        | 67200013  | 48900002    | 2          | -           | -                  |
| <i>Balaenoptera</i>   | 6070      | 6370        | 5          | -           | -                  |
| <i>Balantiopteryx</i> | 4         | 5           | 3          | -           | -                  |

|                        |         |         |    |        |         |
|------------------------|---------|---------|----|--------|---------|
| <i>Bandicota</i>       | 254     | 181     | 3  | -      | -       |
| <i>Barbastella</i>     | 9       | 10      | 2  | -      | -       |
| <i>Bassariscus</i>     | 3060    | 2420    | 2  | -      | -       |
| <i>Bathyergus</i>      | 750     | 500     | 2  | -      | -       |
| <i>Bauerus</i>         | 22      | 29      | 1  | -      | -       |
| <i>Bdeogale</i>        | 1930    | 1570    | 3  | -      | -       |
| <i>Beamys</i>          | 95      | 85      | 1  | -      | -       |
| <i>Berylmys</i>        | 377     | 345     | 4  | -      | -       |
| <i>Bison</i>           | 552000  | 408000  | 1  | 509000 | 675000  |
| <i>Blarina</i>         | 11      | 10      | 3  | -      | -       |
| <i>Bos</i>             | 300000  | 280000  | 5  | 384000 | 1866001 |
| <i>Boselaphus</i>      | 270000  | 119000  | 1  | -      | -       |
| <i>Bradypus</i>        | 4190    | 3995    | 3  | -      | -       |
| <i>Burramys</i>        | 45      | 13      | 1  | -      | -       |
| <i>Caenolestes</i>     | 26      | 22      | 5  | -      | -       |
| <i>Callithrix</i>      | 369     | 354     | 3  | 1300   | 320     |
| <i>Callorhinus</i>     | 177000  | 34500   | 1  | -      | -       |
| <i>Callosciurus</i>    | 290     | 280     | 15 | -      | -       |
| <i>Calomys</i>         | 38      | 29      | 8  | -      | -       |
| <i>Caloprymnus</i>     | 797     | 981     | 1  | -      | -       |
| <i>Caluromys</i>       | 259     | 229     | 3  | -      | -       |
| <i>Canis</i>           | 18960   | 16110   | 7  | -      | -       |
| <i>Capra</i>           | 54050   | 33150   | 6  | 112000 | 75000   |
| <i>Capreolus</i>       | 42050   | 37900   | 2  | -      | -       |
| <i>Capromys</i>        | 754     | 660     | 13 | -      | -       |
| <i>Cardioderma</i>     | 26      | 23      | 1  | -      | -       |
| <i>Casinycteris</i>    | 26      | 29      | 1  | -      | -       |
| <i>Castor</i>          | 13350   | 14600   | 2  | -      | -       |
| <i>Cavia</i>           | 285     | 280     | 7  | 4100   | 810     |
| <i>Cebus</i>           | 3370    | 2450    | 4  | 9100   | 260     |
| <i>Cephalophus</i>     | 22700   | 18100   | 14 | -      | -       |
| <i>Cephalorhynchus</i> | 65300   | 72400   | 4  | -      | -       |
| <i>Ceratotherium</i>   | 2149999 | 1500001 | 1  | -      | -       |
| <i>Cercartetus</i>     | 23      | 20      | 4  | -      | -       |
| <i>Cercocebus</i>      | 9590    | 5940    | 4  | 25100  | 9300    |
| <i>Cercopithecus</i>   | 5860    | 3730    | 21 | 13000  | 4950    |
| <i>Cervus</i>          | 97480   | 66280   | 13 | 219000 | 215000  |
| <i>Chalinolobus</i>    | 9       | 10      | 6  | 14     | 14      |
| <i>Chelemys</i>        | 75      | 72      | 2  | -      | -       |
| <i>Chiroderma</i>      | 19      | 19      | 5  | -      | -       |
| <i>Chiropodomys</i>    | 25      | 26      | 6  | -      | -       |
| <i>Chiropotes</i>      | 3500    | 2500    | 2  | -      | -       |
| <i>Chiruromys</i>      | 48      | 45      | 3  | -      | -       |
| <i>Chlorotalpa</i>     | 58      | 46      | 5  | -      | -       |
| <i>Choeroniscus</i>    | 26      | 29      | 4  | -      | -       |
| <i>Choloepus</i>       | 5250    | 5070    | 2  | -      | -       |
| <i>Chrotomys</i>       | 145     | 141     | 2  | -      | -       |

|                       |        |        |     |        |        |
|-----------------------|--------|--------|-----|--------|--------|
| <i>Chrysocyon</i>     | 23800  | 22700  | 1   | -      | -      |
| <i>Chrysospalax</i>   | 263    | 269    | 2   | -      | -      |
| <i>Clethrionomys</i>  | 20     | 19     | 7   | -      | -      |
| <i>Cloeotis</i>       | 4      | 4      | 2   | -      | -      |
| <i>Coendou</i>        | 4900   | 3050   | 7   | -      | -      |
| <i>Coleura</i>        | 10     | 11     | 2   | -      | -      |
| <i>Colobus</i>        | 10500  | 8340   | 6   | 10000  | 250    |
| <i>Colomys</i>        | 47     | 58     | 1   | -      | -      |
| <i>Condylura</i>      | 41     | 42     | 1   | -      | -      |
| <i>Conepatus</i>      | 2200   | 1770   | 5   | -      | -      |
| <i>Connochaetes</i>   | 210000 | 164000 | 2   | 222000 | 181500 |
| <i>Corollia</i>       | 16     | 15     | 4   | -      | -      |
| <i>Cricetomys</i>     | 1140   | 903    | 2   | -      | -      |
| <i>Cricetus</i>       | 316    | 211    | 1   | -      | -      |
| <i>Crocidura</i>      | 20     | 16     | 133 | -      | -      |
| <i>Crocota</i>        | 66600  | 70000  | 1   | -      | -      |
| <i>Crunomys</i>       | 55     | 55     | 4   | -      | -      |
| <i>Cryptomys</i>      | 86     | 80     | 5   | -      | -      |
| <i>Cryptotis</i>      | 8      | 10     | 12  | -      | -      |
| <i>Ctenomys</i>       | 365    | 292    | 38  | -      | -      |
| <i>Cyclopes</i>       | 374    | 284    | 1   | -      | -      |
| <i>Cynictis</i>       | 589    | 553    | 1   | -      | -      |
| <i>Cynomys</i>        | 893    | 806    | 5   | -      | -      |
| <i>Cynopterus</i>     | 343    | 394    | 5   | 360    | 35     |
| <i>Cystophora</i>     | 400000 | 350000 | 1   | -      | -      |
| <i>Dactylopsila</i>   | 550    | 320    | 4   | -      | -      |
| <i>Damaliscus</i>     | 106000 | 95500  | 3   | -      | -      |
| <i>Dasyercus</i>      | 104    | 85     | 2   | -      | -      |
| <i>Dasymys</i>        | 129    | 127    | 1   | -      | -      |
| <i>Dasyprocta</i>     | 3035   | 2945   | 10  | -      | -      |
| <i>Dasypus</i>        | 6050   | 5380   | 6   | -      | -      |
| <i>Dasyurus</i>       | 3200   | 1910   | 6   | -      | -      |
| <i>Delphinapterus</i> | 947000 | 661000 | 1   | -      | -      |
| <i>Delphinus</i>      | 63900  | 58300  | 2   | -      | -      |
| <i>Dendrolagus</i>    | 8900   | 7350   | 6   | -      | -      |
| <i>Dendromus</i>      | 9      | 8      | 7   | -      | -      |
| <i>Deomys</i>         | 54     | 50     | 1   | -      | -      |
| <i>Depanycteris</i>   | 13     | 16     | 1   | -      | -      |
| <i>Desmodillus</i>    | 53     | 51     | 1   | -      | -      |
| <i>Desmodus</i>       | 29     | 35     | 1   | -      | -      |
| <i>Diaemus</i>        | 36     | 32     | 1   | -      | -      |
| <i>Diceros</i>        | 852000 | 884000 | 1   | -      | -      |
| <i>Diclidurus</i>     | 14     | 13     | 4   | -      | -      |
| <i>Didelphis</i>      | 1320   | 1730   | 3   | -      | -      |
| <i>Diphylla</i>       | 25     | 26     | 1   | -      | -      |
| <i>Dipodomys</i>      | 115    | 112    | 21  | -      | -      |
| <i>Dobsonia</i>       | 280    | 230    | 11  | 1640   | 224    |
| <i>Dorcopsis</i>      | 4540   | 3490   | 5   | -      | -      |

|                       |         |         |    |         |         |
|-----------------------|---------|---------|----|---------|---------|
| <i>Dremomys</i>       | 185     | 173     | 5  | -       | -       |
| <i>Echymipera</i>     | 1330    | 793     | 3  | -       | -       |
| <i>Eidolon</i>        | 224     | 254     | 1  | 5500    | 325     |
| <i>Eira</i>           | 4320    | 3500    | 1  | -       | -       |
| <i>Elephantulus</i>   | 47      | 50      | 10 | -       | -       |
| <i>Eliomys</i>        | 106     | 96      | 2  | -       | -       |
| <i>Emballonura</i>    | 9       | 4       | 10 | -       | -       |
| <i>Enchisthenes</i>   | 17      | 17      | 1  | -       | -       |
| <i>Enhydra</i>        | 34500   | 19600   | 1  | -       | -       |
| <i>Eothenomys</i>     | 18      | 20      | 11 | -       | -       |
| <i>Epomophorus</i>    | 88      | 73      | 6  | 900     | 80      |
| <i>Epomops</i>        | 148     | 102     | 3  | 299     | 160     |
| <i>Eptesicus</i>      | 13      | 14      | 21 | -       | -       |
| <i>Equus</i>          | 269670  | 243330  | 7  | 502000  | 343000  |
| <i>Eremitalpa</i>     | 29      | 23      | 1  | -       | -       |
| <i>Erinaceus</i>      | 653     | 625     | 3  | -       | -       |
| <i>Erythrocebus</i>   | 12400   | 6500    | 1  | 7200    | 10000   |
| <i>Eumops</i>         | 30      | 32      | 8  | -       | -       |
| <i>Euneomys</i>       | 89      | 68      | 1  | -       | -       |
| <i>Felis</i>          | 15450   | 10490   | 26 | 2740    | 4380    |
| <i>Feresa</i>         | 123000  | 114000  | 1  | -       | -       |
| <i>Funambulus</i>     | 91      | 95      | 5  | -       | -       |
| <i>Galago</i>         | 1560    | 151     | 4  | -       | -       |
| <i>Galerella</i>      | 721     | 543     | 3  | -       | -       |
| <i>Gazella</i>        | 23000   | 14000   | 15 | -       | -       |
| <i>Genetta</i>        | 1690    | 1805    | 10 | -       | -       |
| <i>Geomys</i>         | 143     | 101     | 6  | -       | -       |
| <i>Georychus</i>      | 182     | 180     | 1  | -       | -       |
| <i>Geoxus</i>         | 32      | 31      | 1  | -       | -       |
| <i>Gerbillurus</i>    | 35      | 32      | 4  | -       | -       |
| <i>Gerbillus</i>      | 37      | 31      | 48 | -       | -       |
| <i>Giraffa</i>        | 1190000 | 828000  | 1  | 1074000 | 1201000 |
| <i>Glaucomys</i>      | 54      | 56      | 2  | -       | -       |
| <i>Glauconycteris</i> | 11      | 10      | 10 | -       | -       |
| <i>Glis</i>           | 215     | 170     | 1  | -       | -       |
| <i>Glossophaga</i>    | 11      | 10      | 5  | -       | -       |
| <i>Gorilla</i>        | 165000  | 78750   | 1  | 29600   | 169000  |
| <i>Grammomys</i>      | 31      | 33      | 8  | -       | -       |
| <i>Graphiurus</i>     | 48      | 44      | 9  | -       | -       |
| <i>Halichoerus</i>    | 233000  | 155000  | 1  | -       | -       |
| <i>Heliosciurus</i>   | 383     | 360     | 5  | -       | -       |
| <i>Helogale</i>       | 239000  | 184000  | 2  | -       | -       |
| <i>Herpestes</i>      | 1710    | 1790    | 12 | -       | -       |
| <i>Heterohyrax</i>    | 2270    | 2290    | 1  | -       | -       |
| <i>Hippocamelus</i>   | 14500   | 15400   | 2  | -       | -       |
| <i>Hippopotamus</i>   | 1490000 | 1320000 | 1  | 650000  | 1600000 |
| <i>Hipposideros</i>   | 27      | 27      | 54 | -       | -       |
| <i>Homo</i>           | 47900   | 40100   | 1  | 40500   | 65650   |

|                       |         |         |    |         |         |
|-----------------------|---------|---------|----|---------|---------|
| <i>Hyaena</i>         | 40600   | 39050   | 2  | -       | -       |
| <i>Hybomys</i>        | 51      | 52      | 6  | -       | -       |
| <i>Hydrochaerus</i>   | 43100   | 42200   | 1  | -       | -       |
| <i>Hydromys</i>       | 808     | 672     | 4  | -       | -       |
| <i>Hydrurga</i>       | 655000  | 450000  | 1  | -       | -       |
| <i>Hylobates</i>      | 5800    | 4600    | 9  | 5800    | 5470    |
| <i>Hylomys</i>        | 56      | 64      | 1  | -       | -       |
| <i>Hylomys</i>        | 753     | 882     | 1  | -       | -       |
| <i>Hylomyscus</i>     | 20      | 19      | 7  | -       | -       |
| <i>Hyperoodon</i>     | 7500003 | 5799997 | 2  | -       | -       |
| <i>Hypogeomys</i>     | 1200    | 1170    | 1  | -       | -       |
| <i>Hypsignathus</i>   | 273     | 228     | 1  | -       | -       |
| <i>Hypsiprymnodon</i> | 529     | 511     | 1  | -       | -       |
| <i>Hystrix</i>        | 15450   | 16300   | 8  | -       | -       |
| <i>Ichneumia</i>      | 4490    | 4140    | 1  | -       | -       |
| <i>Ictonyx</i>        | 909     | 625     | 1  | -       | -       |
| <i>Irenomys</i>       | 44      | 42      | 1  | -       | -       |
| <i>Isodon</i>         | 1500    | 1050    | 4  | -       | -       |
| <i>Jaculus</i>        | 104     | 104     | 4  | -       | -       |
| <i>Kerivoula</i>      | 6       | 6       | 18 | -       | -       |
| <i>Kobus</i>          | 127000  | 94500   | 5  | 139000  | 166600  |
| <i>Lagenodelphis</i>  | 209000  | 164000  | 1  | -       | -       |
| <i>Lagorchestes</i>   | 1580    | 1740    | 3  | -       | -       |
| <i>Lagostomus</i>     | 5220    | 3070    | 1  | -       | -       |
| <i>Lagothrix</i>      | 6700    | 5900    | 2  | 11200   | 5220    |
| <i>Lasionycteris</i>  | 9       | 11      | 1  | -       | -       |
| <i>Lasiorhinus</i>    | 30      | 33      | 2  | -       | -       |
| <i>Lasiurus</i>       | 12      | 18      | 8  | 12      | 11      |
| <i>Lavia</i>          | 20      | 25      | 1  | -       | -       |
| <i>Leggadina</i>      | 15      | 11      | 2  | 545     | 30      |
| <i>Lemmiscomys</i>    | 46      | 51      | 9  | -       | -       |
| <i>Lemur</i>          | 2710    | 2680    | 1  | 39900   | 2500    |
| <i>Leontopithecus</i> | 560     | 445     | 3  | -       | -       |
| <i>Leopoldamys</i>    | 354     | 287     | 4  | -       | -       |
| <i>Leptomys</i>       | 90      | 90      | 1  | -       | -       |
| <i>Leptonychotes</i>  | 393000  | 410000  | 1  | -       | -       |
| <i>Leptonycteris</i>  | 24      | 23      | 3  | -       | -       |
| <i>Lepus</i>          | 2540    | 2980    | 23 | -       | -       |
| <i>Limnogale</i>      | 76      | 79      | 1  | -       | -       |
| <i>Lionycteris</i>    | 9       | 9       | 1  | -       | -       |
| <i>Lobodon</i>        | 220000  | 242000  | 1  | -       | -       |
| <i>Lonchophylla</i>   | 11      | 10      | 8  | -       | -       |
| <i>Lonchorhina</i>    | 11      | 12      | 4  | -       | -       |
| <i>Lophuromys</i>     | 59      | 38      | 9  | -       | -       |
| <i>Lorentzimys</i>    | 14      | 14      | 1  | -       | -       |
| <i>Loxodonta</i>      | 3230001 | 3050000 | 1  | 4529998 | 4365001 |
| <i>Lutra</i>          | 8980    | 5770    | 8  | -       | -       |
| <i>Lycaon</i>         | 21800   | 22300   | 1  | -       | -       |

|                        |        |        |    |       |      |
|------------------------|--------|--------|----|-------|------|
| <i>Lynx</i>            | 12000  | 10600  | 3  | -     | -    |
| <i>Macaca</i>          | 7690   | 5440   | 16 | 48890 | 8552 |
| <i>Macrogalidea</i>    | 6100   | 4200   | 1  | -     | -    |
| <i>Macroglossus</i>    | 17     | 18     | 3  | 302   | 19   |
| <i>Macrophyllum</i>    | 7      | 7      | 1  | -     | -    |
| <i>Macropus</i>        | 40620  | 17320  | 14 | 33600 | 4200 |
| <i>Macroselides</i>    | 38     | 38     | 1  | -     | -    |
| <i>Macrotis</i>        | 1850   | 704    | 2  | -     | -    |
| <i>Macrotus</i>        | 11     | 11     | 2  | 18    | 16   |
| <i>Malacomys</i>       | 73     | 69     | 4  | -     | -    |
| <i>Malacothrix</i>     | 16     | 14     | 1  | -     | -    |
| <i>Mallomys</i>        | 1090   | 1230   | 4  | -     | -    |
| <i>Mandrillus</i>      | 25000  | 11500  | 1  | -     | -    |
| <i>Manis</i>           | 11300  | 9100   | 3  | -     | -    |
| <i>Margaretamys</i>    | 75     | 70     | 3  | -     | -    |
| <i>Marmosa</i>         | 66     | 59     | 22 | -     | -    |
| <i>Marmota</i>         | 3510   | 3460   | 14 | -     | -    |
| <i>Martes</i>          | 1310   | 980    | 6  | -     | -    |
| <i>Mastomys</i>        | 59     | 49     | 8  | -     | -    |
| <i>Maxomys</i>         | 125    | 126    | 16 | -     | -    |
| <i>Megaloglossus</i>   | 45     | 23     | 1  | -     | -    |
| <i>Melasmothrix</i>    | 51     | 44     | 1  | -     | -    |
| <i>Meles</i>           | 9200   | 8100   | 1  | -     | -    |
| <i>Mellivora</i>       | 8130   | 7730   | 1  | -     | -    |
| <i>Melomys</i>         | 120    | 91     | 22 | -     | -    |
| <i>Mephitis</i>        | 1268   | 1220   | 2  | -     | -    |
| <i>Meriones</i>        | 98     | 78     | 16 | -     | -    |
| <i>Mesembriomys</i>    | 677    | 579    | 2  | -     | -    |
| <i>Mesophylla</i>      | 6      | 7      | 1  | -     | -    |
| <i>Metachirus</i>      | 282    | 236    | 1  | -     | -    |
| <i>Micoureus</i>       | 110    | 99     | 9  | -     | -    |
| <i>Microdipodops</i>   | 10     | 11     | 2  | -     | -    |
| <i>Micronycteris</i>   | 8      | 9      | 9  | -     | -    |
| <i>Micropotamogale</i> | 107    | 95     | 2  | -     | -    |
| <i>Microtus</i>        | 44     | 44     | 45 | 535   | 41   |
| <i>Millardia</i>       | 57     | 53     | 4  | -     | -    |
| <i>Mimon</i>           | 14     | 17     | 3  | -     | -    |
| <i>Miniopterus</i>     | 11     | 11     | 11 | 28    | 9    |
| <i>Miopithecus</i>     | 1380   | 1120   | 1  | -     | -    |
| <i>Mirounga</i>        | 520000 | 346000 | 2  | -     | -    |
| <i>Molossops</i>       | 20     | 17     | 7  | -     | -    |
| <i>Monodelphis0.06</i> | 60     | 20     | 17 | -     | -    |
| <i>Monophyllus</i>     | 15     | 13     | 2  | -     | -    |
| <i>Mormoops</i>        | 17     | 17     | 2  | -     | -    |
| <i>Mormopterus</i>     | 14     | 17     | 10 | -     | -    |
| <i>Mungos</i>          | 1300   | 1400   | 2  | -     | -    |
| <i>Muntiacus</i>       | 22000  | 15000  | 6  | -     | -    |
| <i>Murexia</i>         | 211    | 68     | 2  | -     | -    |

|                        |         |        |    |       |       |
|------------------------|---------|--------|----|-------|-------|
| <i>Mus</i>             | 11      | 9      | 37 | 120   | 15    |
| <i>Mustela</i>         | 624     | 355    | 17 | -     | -     |
| <i>Myocastor</i>       | 9070    | 6350   | 1  | -     | -     |
| <i>Myomyscus</i>       | 44      | 38     | 1  | -     | -     |
| <i>Myonycteris</i>     | 49      | 38     | 3  | -     | -     |
| <i>Myoprocta</i>       | 1200    | 1360   | 2  | -     | -     |
| <i>Myotis</i>          | 8       | 9      | 90 | 54    | 7     |
| <i>Myrmecobius</i>     | 495     | 416    | 1  | -     | -     |
| <i>Mysosorex</i>       | 12      | 12     | 11 | -     | -     |
| <i>Mystacina</i>       | 12      | 17     | 2  | -     | -     |
| <i>Mystromys</i>       | 96      | 78     | 0  | -     | -     |
| <i>Nandinia</i>        | 1990    | 1900   | 1  | -     | -     |
| <i>Nanonycteris</i>    | 20      | 23     | 1  | -     | -     |
| <i>Napaeozapus</i>     | 21      | 23     | 1  | -     | -     |
| <i>Nasalis</i>         | 20000   | 10000  | 1  | 11800 | 20640 |
| <i>Natalus</i>         | 6       | 6      | 5  | -     | -     |
| <i>Nectomys</i>        | 146     | 161    | 2  | -     | -     |
| <i>Neofelis</i>        | 9450    | 12000  | 1  | -     | -     |
| <i>Neohydromys</i>     | 20      | 18     | 1  | -     | -     |
| <i>Neomys</i>          | 79      | 11     | 3  | -     | -     |
| <i>Neophoca</i>        | 300000  | 80000  | 1  | -     | -     |
| <i>Neoplatymops</i>    | 7       | 1      | 1  | -     | -     |
| <i>Neotoma</i>         | 260     | 190    | 19 | -     | -     |
| <i>Neotragus</i>       | 5000    | 5400   | 3  | -     | -     |
| <i>Niviventer</i>      | 73      | 70     | 15 | -     | -     |
| <i>Noctilio</i>        | 48      | 40     | 2  | -     | -     |
| <i>Nycticeinops</i>    | 7       | 7      | 1  | -     | -     |
| <i>Nyctalus</i>        | 45      | 60     | 6  | 270   | 27    |
| <i>Nycteris</i>        | 11      | 12     | 14 | -     | -     |
| <i>Nycticebus</i>      | 850     | 900    | 2  | -     | -     |
| <i>Nyctimene</i>       | 57      | 62     | 14 | -     | -     |
| <i>Ochotona</i>        | 173     | 161    | 19 | -     | -     |
| <i>Ochrotomys</i>      | 20      | 21     | 1  | -     | -     |
| <i>Odobenus</i>        | 1269999 | 850000 | 1  | -     | -     |
| <i>Odocoileus</i>      | 83550   | 59500  | 3  | 81500 | 91500 |
| <i>Oenomys</i>         | 94      | 82     | 1  | -     | -     |
| <i>Ondatra</i>         | 1130    | 1050   | 1  | -     | -     |
| <i>Onychogalea</i>     | 7500    | 5800   | 3  | -     | -     |
| <i>Onychomys</i>       | 26      | 25     | 3  | -     | -     |
| <i>Orcinus</i>         | 2730000 | 909000 | 2  | -     | -     |
| <i>Oreamnos</i>        | 75000   | 70000  | 1  | -     | -     |
| <i>Oreotragus</i>      | 10600   | 10900  | 1  | -     | -     |
| <i>Ornithorhynchus</i> | 1740    | 1270   | 1  | -     | -     |
| <i>Orycteropus</i>     | 54100   | 46300  | 1  | -     | -     |
| <i>Oryctolagus</i>     | 1570    | 1590   | 1  | 5510  | 4100  |
| <i>Oryx</i>            | 166350  | 148850 | 3  | -     | -     |
| <i>Oryzomys</i>        | 47      | 42     | 54 | -     | -     |
| <i>Otaria</i>          | 3000000 | 160000 | 1  | -     | -     |

|                       |        |       |    |        |        |
|-----------------------|--------|-------|----|--------|--------|
| <i>Otocyon</i>        | 4030   | 4120  | 1  | -      | -      |
| <i>Otolemur</i>       | 950    | 740   | 2  | -      | -      |
| <i>Otomys</i>         | 145    | 123   | 11 | -      | -      |
| <i>Ourebia</i>        | 13000  | 14000 | 1  | -      | -      |
| <i>Ovis</i>           | 100000 | 60000 | 6  | 338000 | 122000 |
| <i>Oxymycterus</i>    | 74     | 93    | 11 | -      | -      |
| <i>Pan</i>            | 50000  | 40000 | 2  | 118800 | 44340  |
| <i>Panthera</i>       | 140300 | 91300 | 5  | -      | -      |
| <i>Pantholops</i>     | 45500  | 27500 | 1  | -      | -      |
| <i>Papio</i>          | 22830  | 12820 | 5  | 51900  | 24390  |
| <i>Pappogeomys</i>    | 297    | 248   | 9  | -      | -      |
| <i>Paracynictis</i>   | 1640   | 1640  | 1  | -      | -      |
| <i>Paraleptomys</i>   | 54     | 58    | 2  | -      | -      |
| <i>Paranthechinus</i> | 28     | 23    | 6  | -      | -      |
| <i>Paranycimene</i>   | 24     | 26    | 1  | -      | -      |
| <i>Paraxerus</i>      | 180    | 240   | 11 | -      | -      |
| <i>Parotomys</i>      | 138    | 121   | 2  | -      | -      |
| <i>Pedetes</i>        | 3230   | 3230  | 1  | -      | -      |
| <i>Pelomys</i>        | 142    | 118   | 7  | -      | -      |
| <i>Perameles</i>      | 779    | 655   | 4  | -      | -      |
| <i>Peromyscus</i>     | 22     | 23    | 51 | 390    | 20     |
| <i>Peropteryx</i>     | 6      | 7     | 2  | -      | -      |
| <i>Perorcytes</i>     | 865    | 812   | 4  | -      | -      |
| <i>Petaurista</i>     | 1260   | 1330  | 8  | -      | -      |
| <i>Petaurus</i>       | 455    | 172   | 4  | -      | -      |
| <i>Petrodromus</i>    | 179    | 196   | 1  | -      | -      |
| <i>Petromus</i>       | 191    | 257   | 1  | -      | -      |
| <i>Phacochoerus</i>   | 43000  | 37500 | 1  | 93000  | 88000  |
| <i>Phalanger</i>      | 2328   | 2198  | 12 |        |        |
| <i>Phascogale</i>     | 130    | 94    | 2  | -      | -      |
| <i>Phascorarctos</i>  | 6500   | 5100  | 1  | -      | -      |
| <i>Phataginus</i>     | 6450   | 4090  | 4  | -      | -      |
| <i>Philantomba</i>    | 4000   | 4700  | 2  | -      | -      |
| <i>Phoca</i>          | 94600  | 87600 | 7  | -      | -      |
| <i>Phocoena</i>       | 47350  | 48500 | 4  | -      | -      |
| <i>Phyllostomus</i>   | 56     | 54    | 4  | -      | -      |
| <i>Phyllotis</i>      | 54     | 40    | 12 | -      | -      |
| <i>Pipistrellus</i>   | 4      | 5     | 74 | 56     | 5      |
| <i>Pithecheir</i>     | 102    | 104   | 2  | -      | -      |
| <i>Pithecia</i>       | 1930   | 1510  | 5  | -      | -      |
| <i>Pitymys</i>        | 29     | 31    | 22 | -      | -      |
| <i>Planigale</i>      | 8      | 7     | 5  | -      | -      |
| <i>Plecotus</i>       | 8      | 8     | 6  | 377    | 9      |
| <i>Poecilogale</i>    | 263    | 173   | 1  | -      | -      |
| <i>Pogonomelomys</i>  | 33     | 26    | 4  | -      | -      |
| <i>Pogonomys</i>      | 62     | 61    | 4  | -      | -      |
| <i>Pongo</i>          | 86300  | 38700 | 1  | -      | -      |
| <i>Potorous</i>       | 1475   | 1235  | 3  | -      | -      |

|                        |        |        |    |      |      |
|------------------------|--------|--------|----|------|------|
| <i>Potos</i>           | 1620   | 1650   | 1  | -    | -    |
| <i>Praomys</i>         | 385    | 323    | 12 | -    | -    |
| <i>Presbytis</i>       | 11630  | 7930   | 15 | 6375 | 9300 |
| <i>Procavia</i>        | 3760   | 3560   | 4  | -    | -    |
| <i>Procyon</i>         | 6950   | 5950   | 2  | -    | -    |
| <i>Promops</i>         | 14     | 16     | 2  | -    | -    |
| <i>Pronolagus</i>      | 1760   | 2180   | 3  | -    | -    |
| <i>Proteles</i>        | 7000   | 6850   | 1  | -    | -    |
| <i>Protoxerus</i>      | 506    | 737    | 2  | -    | -    |
| <i>Psammomys</i>       | 92     | 69     | 2  | -    | -    |
| <i>Pseudocheirus</i>   | 1251   | 1123   | 10 | -    | -    |
| <i>Pseudohydromys</i>  | 26     | 22     | 2  | -    | -    |
| <i>Pseudoryzomys</i>   | 56     | 46     | 2  | -    | -    |
| <i>Pteronotus</i>      | 32     | 31     | 6  | -    | -    |
| <i>Pteropus</i>        | 1220   | 990    | 56 | 5810 | 703  |
| <i>Raphiceros</i>      | 9400   | 9830   | 3  | -    | -    |
| <i>Rattus</i>          | 155    | 137    | 51 | 3800 | 500  |
| <i>Ratufa</i>          | 1540   | 1420   | 4  | -    | -    |
| <i>Redunca</i>         | 41000  | 33400  | 3  | -    | -    |
| <i>Reithrodontomys</i> | 12     | 12     | 19 | -    | -    |
| <i>Rhabdomys</i>       | 45     | 40     | 1  | -    | -    |
| <i>Rhinolophus</i>     | 13     | 13     | 64 | 177  | 16   |
| <i>Rhinophylla</i>     | 9      | 10     | 3  | -    | -    |
| <i>Rhinopoma</i>       | 17     | 16     | 3  | -    | -    |
| <i>Rhogeessa</i>       | 4      | 4      | 6  | -    | -    |
| <i>Rhynchogale</i>     | 2310   | 1920   | 1  | -    | -    |
| <i>Rhynchonycteris</i> | 4      | 40     | 1  | -    | -    |
| <i>Rousettus</i>       | 89     | 87     | 10 | 2120 | 117  |
| <i>Rupicapra</i>       | 40000  | 33500  | 2  | -    | -    |
| <i>Saccopteryx</i>     | 5      | 6      | 4  | -    | -    |
| <i>Saccostomus</i>     | 47     | 43     | 2  | -    | -    |
| <i>Saguinus</i>        | 402    | 345    | 11 | 3400 | 520  |
| <i>Saiga</i>           | 41750  | 31150  | 1  | -    | -    |
| <i>Saimiri</i>         | 885    | 708    | 5  | 3200 | 780  |
| <i>Sarcophilus</i>     | 8000   | 6000   | 1  | -    | -    |
| <i>Sauromys</i>        | 13     | 15     | 1  | -    | -    |
| <i>Scalopus</i>        | 70     | 64     | 1  | -    | -    |
| <i>Sciurus</i>         | 353    | 452    | 27 | -    | -    |
| <i>Scotonycteris</i>   | 20     | 20     | 2  | -    | -    |
| <i>Scotophilus</i>     | 23     | 25     | 12 | 148  | 37   |
| <i>Setonyx</i>         | 3600   | 2900   | 1  | -    | -    |
| <i>Sigmoceros</i>      | 177000 | 166000 | 1  | -    | -    |
| <i>Sigmodon</i>        | 95     | 92     | 8  | -    | -    |
| <i>Sminthopsis</i>     | 24     | 17     | 19 | -    | -    |
| <i>Sorex</i>           | 6      | 6      | 61 | 281  | 11   |
| <i>Soriculus</i>       | 7      | 7      | 10 | -    | -    |
| <i>Sotalia</i>         | 54000  | 55000  | 1  | -    | -    |
| <i>Spalacopus</i>      | 65     | 190    | 1  | -    | -    |

|                        |        |        |    |        |        |
|------------------------|--------|--------|----|--------|--------|
| <i>Spermophilus</i>    | 354    | 303    | 36 | -      | -      |
| <i>Sphaerias</i>       | 26     | 30     | 1  | -      | -      |
| <i>Sphaeronycteris</i> | 15     | 15     | 1  | -      | -      |
| <i>Spilocuscus</i>     | 5035   | 4780   | 3  | -      | -      |
| <i>Steatomys</i>       | 21     | 25     | 6  | -      | -      |
| <i>Stenella</i>        | 60600  | 57400  | 5  | -      | -      |
| <i>Stochomys</i>       | 87     | 81     | 1  | -      | -      |
| <i>Sturnira</i>        | 26     | 26     | 13 | -      | -      |
| <i>Suncus</i>          | 35     | 22     | 14 | -      | -      |
| <i>Sundamys</i>        | 300    | 334    | 3  | -      | -      |
| <i>Sundasciurus</i>    | 93     | 78     | 12 | -      | -      |
| <i>Suricata</i>        | 731    | 720    | 1  | -      | -      |
| <i>Sus</i>             | 67100  | 24000  | 4  | 720000 | 172000 |
| <i>Syconycteris</i>    | 17     | 18     | 3  | -      | -      |
| <i>Sylvicapra</i>      | 18700  | 20700  | 1  | -      | -      |
| <i>Sylvilagus</i>      | 1226   | 1171   | 12 | -      | -      |
| <i>Synaptomys</i>      | 325    | 385    | 2  | -      | -      |
| <i>Tachyglossus</i>    | 2870   | 3600   | 1  | -      | -      |
| <i>Tadarida</i>        | 21     | 24     | 41 | -      | -      |
| <i>Talpa</i>           | 110    | 85     | 15 | -      | -      |
| <i>Tamandua</i>        | 6000   | 5030   | 2  | -      | -      |
| <i>Tamias</i>          | 62     | 71     | 21 | -      | -      |
| <i>Tamiasciurus</i>    | 204    | 199    | 3  | -      | -      |
| <i>Tamiops</i>         | 45     | 53     | 4  | -      | -      |
| <i>Taphozous</i>       | 27     | 26     | 18 | -      | -      |
| <i>Tarsipes</i>        | 8      | 9      | 1  | -      | -      |
| <i>Tarsius</i>         | 95     | 104    | 4  | -      | -      |
| <i>Tatera</i>          | 109    | 102    | 11 | -      | -      |
| <i>Taxidea</i>         | 7380   | 7000   | 1  | -      | -      |
| <i>Tayassu</i>         | 20000  | 22000  | 2  | 11000  | 12300  |
| <i>Thallomys</i>       | 81     | 80     | 1  | -      | -      |
| <i>Theropithecus</i>   | 20500  | 13600  | 1  | 17100  | 20400  |
| <i>Thomomys</i>        | 114    | 103    | 8  | -      | -      |
| <i>Thryonomys</i>      | 3185   | 2440   | 2  | -      | -      |
| <i>Thylogale</i>       | 6370   | 3970   | 4  | -      | -      |
| <i>Thyroptera</i>      | 5      | 5      | 2  | -      | -      |
| <i>Tonatia</i>         | 25     | 16     | 8  | -      | -      |
| <i>Trachops</i>        | 34     | 33     | 1  | -      | -      |
| <i>Tragelaphus</i>     | 126170 | 79930  | 9  | 92000  | 248000 |
| <i>Trichechus</i>      | 86900  | 26000  | 3  | -      | -      |
| <i>Trichosurus</i>     | 3250   | 2500   | 4  | 7400   | 1980   |
| <i>Tupaia</i>          | 112    | 123    | 10 | -      | -      |
| <i>Tursiops</i>        | 188000 | 117000 | 1  | -      | -      |
| <i>Uranomys</i>        | 37     | 30     | 1  | -      | -      |
| <i>Urocyon</i>         | 3900   | 3160   | 2  | -      | -      |
| <i>Uroderma</i>        | 16     | 18     | 2  | -      | -      |
| <i>Uromys</i>          | 751    | 30     | 5  | -      | -      |
| <i>Ursus</i>           | 165300 | 138300 | 2  | -      | -      |

|                   |       |       |    |     |    |
|-------------------|-------|-------|----|-----|----|
| <i>Vampyressa</i> | 10    | 11    | 5  | -   | -  |
| <i>Vampyrodes</i> | 27    | 30    | 2  | -   | -  |
| <i>Vampyrops</i>  | 18    | 20    | 8  | -   | -  |
| <i>Vampyrum</i>   | 190   | 200   | 1  | -   | -  |
| <i>Viverra</i>    | 14500 | 10900 | 1  | -   | -  |
| <i>Vulpes</i>     | 6830  | 3150  | 10 | -   | -  |
| <i>Wallabia</i>   | 17000 | 13000 | 1  | -   | -  |
| <i>Xerus</i>      | 649   | 600   | 4  | -   | -  |
| <i>Zaglossus</i>  | 7000  | 8600  | 1  | -   | -  |
| <i>Zapus</i>      | 18    | 19    | 3  | -   | -  |
| <i>Zelotomys</i>  | 54    | 54    | 2  | -   | -  |
| <i>Zyzyomys</i>   | 66    | 64    | 5  | 434 | 45 |

Appendix B. Data on male and female wingspans (millimetres) and speciosity (=number of species per genus) across 105 butterfly genera of Papua New Guinea

| GENUS               | MALE SPAN | FEMALE SPAN | SPECIOSITY |
|---------------------|-----------|-------------|------------|
| <i>acupicta</i>     | 35        | 33          | 1          |
| <i>allora</i>       | 42.5      | 44          | 2          |
| <i>amblypodia</i>   | 44        | 45          | 1          |
| <i>anthene</i>      | 30.33     | 30.67       | 3          |
| <i>apaturina</i>    | 75        | 79          | 1          |
| <i>appias</i>       | 54.33     | 54          | 3          |
| <i>argyronympha</i> | 39        | 41          | 1          |
| <i>arhopala</i>     | 42.7      | 42.2        | 40         |
| <i>artipe</i>       | 49.67     | 50          | 3          |
| <i>atrophaneura</i> | 80        | 90          | 1          |
| <i>badamia</i>      | 52        | 54          | 1          |
| <i>banta</i>        | 34        | 37          | 1          |
| <i>belenois</i>     | 54        | 57          | 1          |
| <i>bindahara</i>    | 34.5      | 37          | 2          |
| <i>borbo</i>        | 34        | 37          | 2          |
| <i>caltoris</i>     | 40.5      | 44.5        | 2          |
| <i>catochrysops</i> | 26.13     | 25          | 4          |
| <i>catopsilia</i>   | 63        | 65          | 2          |
| <i>cepora</i>       | 53.5      | 54.5        | 2          |
| <i>chaetocneme</i>  | 49.75     | 54.33       | 14         |
| <i>charaxes</i>     | 75        | 93          | 1          |
| <i>choaspes</i>     | 54        | 56.5        | 2          |
| <i>cressida</i>     | 72        | 86          | 1          |
| <i>curetis</i>      | 38        | 39          | 1          |
| <i>danaus</i>       | 72        | 74          | 3          |
| <i>danis</i>        | 40.2      | 40.6        | 5          |
| <i>delias</i>       | 51.5      | 52.7        | 63         |
| <i>dicallaneura</i> | 38.44     | 39.89       | 9          |
| <i>dichorraquia</i> | 74        | 78          | 1          |

|                      |        |        |    |
|----------------------|--------|--------|----|
| <i>discolampa</i>    | 25     | 26     | 1  |
| <i>elodina</i>       | 43.47  | 43.2   | 7  |
| <i>elymnias</i>      | 69.5   | 73.75  | 4  |
| <i>epimastidia</i>   | 37     | 37     | 2  |
| <i>erionota</i>      | 58     | 69     | 1  |
| <i>ertcinidia</i>    | 36.9   | 40     | 5  |
| <i>erysichton</i>    | 28.75  | 26.75  | 3  |
| <i>eurema</i>        | 41.57  | 41.86  | 7  |
| <i>felicena</i>      | 30     | 32     | 2  |
| <i>gandaca</i>       | 44     | 45     | 1  |
| <i>graphium</i>      | 68.87  | 76     | 14 |
| <i>harsiesis</i>     | 38     | 40.5   | 2  |
| <i>hasora</i>        | 42.45  | 45.88  | 10 |
| <i>helcyra</i>       | 56     | 58     | 1  |
| <i>hewitsoniella</i> | 42     | 42     | 1  |
| <i>horaga</i>        | 32     | 27     | 1  |
| <i>hyantis</i>       | 75     | 80     | 1  |
| <i>hypochlorosis</i> | 36     | 36     | 2  |
| <i>hypochrysops</i>  | 32     | 34.4   | 36 |
| <i>hypocysta</i>     | 32.4   | 34.5   | 5  |
| <i>hypolycaena</i>   | 31.33  | 33.5   | 5  |
| <i>ideopsis</i>      | 70     | 73     | 1  |
| <i>kobrona</i>       | 28.07  | 29.45  | 17 |
| <i>lampides</i>      | 32     | 32     | 1  |
| <i>lamprolenis</i>   | 57     | 66     | 1  |
| <i>leuciactria</i>   | 39     | 35     | 1  |
| <i>libythea</i>      | 53     | 53     | 1  |
| <i>liphya</i>        | 67.5   | 81.5   | 2  |
| <i>logania</i>       | 23     | 26     | 1  |
| <i>melanitis</i>     | 69     | 78.67  | 3  |
| <i>melanolycaena</i> | 26.5   | 27.5   | 2  |
| <i>mimene</i>        | 37.4   | 40.14  | 21 |
| <i>morphopsis</i>    | 81.75  | 89.75  | 4  |
| <i>mycalesis</i>     | 43.87  | 48.54  | 28 |
| <i>nacaduba</i>      | 29.39  | 28.67  | 15 |
| <i>nacaduba</i>      | 29.23  | 29     | 15 |
| <i>netrocoryne</i>   | 39     | 38     | 1  |
| <i>nothodanis</i>    | 35     | 35     | 1  |
| <i>notocrypta</i>    | 39.08  | 44.17  | 6  |
| <i>ogyris</i>        | 54.5   | 56     | 2  |
| <i>ornithoptera</i>  | 140.29 | 170.86 | 7  |
| <i>orsotriaena</i>   | 43     | 45     | 1  |
| <i>papilio</i>       | 97.43  | 104.7  | 14 |
| <i>parantica</i>     | 64.25  | 67.7   | 8  |
| <i>pamara</i>        | 30.25  | 30     | 2  |
| <i>pastria</i>       | 32.83  | 36     | 3  |
| <i>pelopidas</i>     | 34.33  | 35.67  | 3  |

|                      |       |       |    |
|----------------------|-------|-------|----|
| <i>perpheres</i>     | 39    | 40    | 2  |
| <i>petrelaea</i>     | 22    | 22    | 1  |
| <i>petrelaea</i>     | 22    | 22    | 1  |
| <i>philiris</i>      | 27.5  | 28.6  | 56 |
| <i>polyura</i>       | 66    | 72    | 2  |
| <i>prada</i>         | 33    | 37    | 3  |
| <i>praetaxila</i>    | 48.44 | 53.78 | 9  |
| <i>prothoe</i>       | 82.33 | 88.67 | 3  |
| <i>protoploea</i>    | 65    | 67    | 1  |
| <i>pseudodipsas</i>  | 25.8  | 28.33 | 5  |
| <i>psychonotis</i>   | 27.5  | 27.5  | 6  |
| <i>rachelia</i>      | 35.5  | 40.5  | 2  |
| <i>rapala</i>        | 32    | 33    | 1  |
| <i>sabera</i>        | 33.19 | 34.67 | 13 |
| <i>saletara</i>      | 47    | 45    | 1  |
| <i>spalgis</i>       | 23.75 | 24.5  | 2  |
| <i>tagiades</i>      | 38    | 43    | 3  |
| <i>taractrocera</i>  | 20    | 19    | 4  |
| <i>tartesa</i>       | 27    | 27    | 1  |
| <i>tellervo</i>      | 42.75 | 43.5  | 4  |
| <i>thaumaina</i>     | 23    | 23    | 1  |
| <i>theclinesthes</i> | 26    | 27.5  | 1  |
| <i>tiacellia</i>     | 48    | 54    | 1  |
| <i>tirumala</i>      | 80    | 79    | 1  |
| <i>titea</i>         | 28    | 28.25 | 2  |
| <i>toxidía</i>       | 32.5  | 35    | 2  |
| <i>troides</i>       | 125   | 142   | 1  |
| <i>upolampes</i>     | 24.5  | 24.5  | 2  |
| <i>ypthima</i>       | 30    | 36    | 1  |

Appendix C. Mean spermatophore counts (number per mated female) and two measures of speciosity (=number of species/genus) across 54 butterfly genera. Speciosity (1) mainly based on Smart 1975 and published sources, Speciosity (2) based on [www.funet.fi/pub/bio/life/intro.html](http://www.funet.fi/pub/bio/life/intro.html) (see Methods for details)

| GENUS              | SPECIOSITY (1) | SPECIOSITY (2) | SPERMATOPHORE COUNT |
|--------------------|----------------|----------------|---------------------|
| <i>ACRAEA</i>      | 250            | 182            | 1.108               |
| <i>AGLAIS</i>      | 3              | 4              | 1.87                |
| <i>AGRAULIS</i>    | 1              | 1              | 1.16                |
| <i>ANARTIA</i>     | 4              | 5              | 1.16                |
| <i>ANTHOCARIS</i>  | 11             | 15             | 1.07                |
| <i>APHANTOPUS</i>  | 2              | 3              | 1.05                |
| <i>APORIA</i>      | 12             | 23             | 1.69                |
| <i>ASCIA</i>       | 6              | 8              | 1.2                 |
| <i>BATTUS</i>      | 14             | 15             | 1.73                |
| <i>BIBLIS</i>      | 1              | 1              | 1.95                |
| <i>CATENOPHILE</i> | 12             | 11             | 1.6                 |
| <i>CELASTRINA</i>  | 15             | 18             | 1                   |

|                     |     |     |       |
|---------------------|-----|-----|-------|
| <i>CHLOSYPNE</i>    | 30  | 15  | 1.106 |
| <i>COENONYMPHA</i>  | 22  | 39  | 1.02  |
| <i>COLIAS</i>       | 30  | 70  | 1.28  |
| <i>DANAUS</i>       | 11  | 11  | 3.16  |
| <i>DEUDORIX</i>     | 38  | 110 | 1     |
| <i>DRYAS</i>        | 1   | 1   | 1.9   |
| <i>EREBIA</i>       | 78  | 91  | 1     |
| <i>EUCHLOE</i>      | 8   | 21  | 1.74  |
| <i>EUPHYDRYAS</i>   | 14  | 15  | 1.3   |
| <i>EUPLOEA</i>      | 54  | 56  | 1.84  |
| <i>EUPTOIETA</i>    | 2   | 2   | 1     |
| <i>EUPTYCHIA</i>    | 200 | 61  | 1.15  |
| <i>EUREMA</i>       | 61  | 65  | 1.35  |
| <i>EVERES</i>       | 7   | 11  | 1     |
| <i>GLAUCOPSYCHE</i> | 7   | 10  | 1     |
| <i>GONEPTERYX</i>   | 7   | 7   | 1.2   |
| <i>HELICONIUS</i>   | 38  | 51  | 1.13  |
| <i>HIPPARCHIA</i>   | 12  | 25  | 1.2   |
| <i>HYPAUROTIS</i>   | 1   | 1   | 1.33  |
| <i>INACHIS</i>      | 1   | 1   | 1.07  |
| <i>ITHOMIA</i>      | 21  | 33  | 2.91  |
| <i>LASIOMMATA</i>   | 6   | 15  | 1.107 |
| <i>LEPTIDEA</i>     | 5   | 7   | 1.15  |
| <i>LYCAENA</i>      | 39  | 40  | 1.04  |
| <i>MANIOLA</i>      | 5   | 7   | 1.26  |
| <i>NEOMINOIS</i>    | 1   | 2   | 1.03  |
| <i>NYMPHIDIUM</i>   | 30  | 19  | 3.13  |
| <i>OENEIS</i>       | 25  | 35  | 1.28  |
| <i>PAPILIO</i>      | 208 | 233 | 1.36  |
| <i>PARARGE</i>      | 5   | 3   | 1     |
| <i>PARIDES</i>      | 45  | 44  | 1.29  |
| <i>PHOEBIS</i>      | 14  | 10  | 1.42  |
| <i>PHYCIODES</i>    | 11  | 38  | 1.1   |
| <i>PIERIS</i>       | 20  | 31  | 1.84  |
| <i>PLEBEJUS</i>     | 25  | 49  | 1     |
| <i>POLADRYAS</i>    | 2   | 2   | 1.02  |
| <i>POLYGONIA</i>    | 11  | 16  | 1.91  |
| <i>PONTIA</i>       | 8   | 11  | 1.84  |
| <i>PRECIS</i>       | 44  | 47  | 1.5   |
| <i>PTERONYMIA</i>   | 30  | 33  | 1.5   |
| <i>SPEYERIA</i>     | 16  | 18  | 1.05  |
| <i>TITHOREA</i>     | 2   | 5   | 1.46  |

Appendix D. Data on female and male mean body size (length in mm from abdomen tip to front of prosoma) and speciosity (=number of species per genus) across 148 spider genera

| GENUS                 | FEMALE | MALE | SPECIOSITY |
|-----------------------|--------|------|------------|
| <i>Achaearanea</i>    | 4.09   | 2.93 | 6          |
| <i>Aculepeira</i>     | 13     | 7.5  | 2          |
| <i>Aelurillus</i>     | 6.5    | 4.5  | 1          |
| <i>Agalenatea</i>     | 6.25   | 4    | 1          |
| <i>Agelena</i>        | 9.63   | 7.63 | 2          |
| <i>Agraecina</i>      | 5      | 3.25 | 1          |
| <i>Agroeca</i>        | 6.2    | 4.85 | 5          |
| <i>Alopecosa</i>      | 9.94   | 8.13 | 17         |
| <i>Amaurobius</i>     | 10.3   | 7.2  | 5          |
| <i>Anelosimus</i>     | 3.25   | 2.88 | 3          |
| <i>Antistea</i>       | 2.75   | 2.75 | 1          |
| <i>Anyphaena</i>      | 6.5    | 5.75 | 1          |
| <i>Aphantaulax</i>    | 5.5    | 4.5  | 1          |
| <i>Apostenus</i>      | 3.5    | 3.4  | 1          |
| <i>Araneus</i>        | 10.92  | 6.83 | 9          |
| <i>Araniella</i>      | 5.75   | 4.15 | 6          |
| <i>Arctosa</i>        | 9.75   | 8.29 | 9          |
| <i>Argiope</i>        | 13     | 4.25 | 2          |
| <i>Argyroneta</i>     | 14     | 11.5 | 1          |
| <i>Atea</i>           | 4.88   | 3.38 | 2          |
| <i>Attulus</i>        | 3.5    | 3    | 1          |
| <i>Atypus</i>         | 12.5   | 8    | 2          |
| <i>Aulonia</i>        | 4      | 3.25 | 1          |
| <i>Ballus</i>         | 4.75   | 3.5  | 1          |
| <i>Bathyphantes</i>   | 2.39   | 2.25 | 7          |
| <i>Bianor</i>         | 3.6    | 3.25 | 1          |
| <i>Bolyphantes</i>    | 3.88   | 3.38 | 4          |
| <i>Callilepis</i>     | 4.75   | 3.75 | 1          |
| <i>Cercidia</i>       | 4.25   | 3.5  | 1          |
| <i>Cheiracanthium</i> | 9.1    | 7.25 | 8          |
| <i>Circurina</i>      | 6      | 6    | 1          |
| <i>Clubionia</i>      | 6.32   | 5.14 | 19         |
| <i>Coelotes</i>       | 10.5   | 8.17 | 3          |
| <i>Coriachne</i>      | 4.5    | 4.5  | 1          |
| <i>Crustulina</i>     | 2.13   | 2.13 | 2          |
| <i>Cryphoeca</i>      | 2.75   | 2.75 | 1          |
| <i>Cyclosa</i>        | 5.38   | 3.75 | 2          |
| <i>Dendryphantes</i>  | 5.5    | 4.75 | 2          |
| <i>Diaea</i>          | 5.5    | 3.5  | 1          |

|                      |       |       |    |
|----------------------|-------|-------|----|
| <i>Dictyna</i>       | 2.68  | 2.29  | 7  |
| <i>Dipoena</i>       | 2.7   | 2.27  | 9  |
| <i>Dolomedes</i>     | 16.5  | 12.75 | 2  |
| <i>Drapetisca</i>    | 3.6   | 3.6   | 1  |
| <i>Drassodes</i>     | 11.83 | 10.67 | 3  |
| <i>Dysdera</i>       | 11.25 | 8.5   | 2  |
| <i>Enoplognatha</i>  | 4.57  | 3.5   | 8  |
| <i>Episinus</i>      | 4.36  | 3.88  | 3  |
| <i>Eresus</i>        | 12    | 8.5   | 1  |
| <i>Eris</i>          | 5.5   | 4.75  | 1  |
| <i>Ero</i>           | 3.1   | 2.69  | 4  |
| <i>Euophrys</i>      | 3.33  | 2.79  | 11 |
| <i>Euryopis</i>      | 3.25  | 2.63  | 4  |
| <i>Evarcha</i>       | 6.83  | 5.17  | 4  |
| <i>Floronia</i>      | 4.5   | 4.5   | 1  |
| <i>Frontinellina</i> | 4.55  | 4.25  | 1  |
| <i>Gibbaranea</i>    | 7     | 5.67  | 4  |
| <i>Gnaphosa</i>      | 9.69  | 8.31  | 15 |
| <i>Gonatium</i>      | 3     | 2.65  | 4  |
| <i>Hahnia</i>        | 1.83  | 2.84  | 9  |
| <i>Haplodrassus</i>  | 6.71  | 5.21  | 3  |
| <i>Harpactea</i>     | 8.25  | 6.5   | 2  |
| <i>Heliophanus</i>   | 5.27  | 3.71  | 11 |
| <i>Helophora</i>     | 3.75  | 3.4   | 1  |
| <i>Heriaeus</i>      | 7.5   | 4.5   | 3  |
| <i>Histopona</i>     | 6     | 5.25  | 1  |
| <i>Hygrolycosa</i>   | 5.75  | 5.25  | 1  |
| <i>Hypsosinga</i>    | 3.63  | 2.59  | 4  |
| <i>Hyptiotes</i>     | 5.5   | 3.5   | 1  |
| <i>Labulla</i>       | 4.9   | 5     | 1  |
| <i>Larinioides</i>   | 8.5   | 6.83  | 5  |
| <i>Lathys</i>        | 2.18  | 1.89  | 3  |
| <i>Lepthyphantes</i> | 2.73  | 2.52  | 71 |
| <i>Leptorchestes</i> | 6     | 6     | 1  |
| <i>Linyphia</i>      | 5.15  | 4.4   | 4  |
| <i>Liocranum</i>     | 8.25  | 6.88  | 2  |
| <i>Mangora</i>       | 3.75  | 2.75  | 1  |
| <i>Marpissa</i>      | 8     | 6.13  | 5  |
| <i>Mastigusa</i>     | 3.25  | 3.25  | 2  |
| <i>Meta</i>          | 9.2   | 7.45  | 5  |
| <i>Micaria</i>       | 4.36  | 3.76  | 15 |
| <i>Microlinyphia</i> | 4.25  | 3.63  | 2  |
| <i>Micrommata</i>    | 12.5  | 9     | 1  |
| <i>Misumena</i>      | 10    | 3.5   | 1  |
| <i>Misumenops</i>    | 5.5   | 3     | 1  |
| <i>Mymarachne</i>    | 5.5   | 6     | 1  |
| <i>Neon</i>          | 2.5   | 2.25  | 4  |
| <i>Neoscona</i>      | 6     | 4.5   | 1  |

|                       |       |      |    |
|-----------------------|-------|------|----|
| <i>Neriene</i>        | 4.54  | 4.27 | 7  |
| <i>Nesticus</i>       | 4.75  | 4    | 2  |
| <i>Nigma</i>          | 3.42  | 2.75 | 3  |
| <i>Nuctenea</i>       | 10    | 8    | 2  |
| <i>Oecobus</i>        | 2.25  | 2.25 | 1  |
| <i>Oonops</i>         | 1.6   | 1.6  | 2  |
| <i>Ostearius</i>      | 2.3   | 2.3  | 1  |
| <i>Oxyopes</i>        | 6.92  | 5.5  | 3  |
| <i>Ozyptila</i>       | 3.89  | 2.86 | 12 |
| <i>Pachygnatha</i>    | 4.71  | 4    | 3  |
| <i>Pardosa</i>        | 6.05  | 5.08 | 39 |
| <i>Pellenes</i>       | 6.25  | 4.5  | 3  |
| <i>Peecilochroa</i>   | 7.75  | 6.25 | 2  |
| <i>Phaeoecelus</i>    | 5.5   | 4.5  | 1  |
| <i>Philaeus</i>       | 9.5   | 9.5  | 1  |
| <i>Philodromus</i>    | 5.34  | 4.1  | 17 |
| <i>Phlegra</i>        | 6.5   | 5.5  | 3  |
| <i>Pholcomma</i>      | 1.38  | 1.38 | 1  |
| <i>Pholcus</i>        | 6.88  | 7.13 | 2  |
| <i>Phrurolithus</i>   | 2.88  | 2.5  | 4  |
| <i>Pirata</i>         | 5.84  | 4.84 | 8  |
| <i>Pisaura</i>        | 13.5  | 11.5 | 1  |
| <i>Pistius</i>        | 8     | 4.5  | 1  |
| <i>Pityohyphantes</i> | 5     | 4.5  | 1  |
| <i>Poeciloneta</i>    | 2.2   | 2.08 | 1  |
| <i>Pseudicius</i>     | 5     | 4.25 | 1  |
| <i>Psilochorus</i>    | 2.25  | 2.25 | 1  |
| <i>Robertus</i>       | 2.44  | 2.28 | 9  |
| <i>Runcinia</i>       | 5     | 3    | 1  |
| <i>Salticus</i>       | 5.17  | 4.75 | 4  |
| <i>Scotina</i>        | 3.46  | 2.92 | 3  |
| <i>Scotophaeus</i>    | 11.83 | 8.67 | 3  |
| <i>Scytodes</i>       | 5     | 4    | 1  |
| <i>Segestria</i>      | 12.5  | 10   | 3  |
| <i>Singa</i>          | 5.5   | 3.5  | 2  |
| <i>Sitticus</i>       | 4.94  | 4.06 | 11 |
| <i>Steatoda</i>       | 6.98  | 5.17 | 8  |
| <i>Stemonyphantes</i> | 5.4   | 4.5  | 1  |
| <i>Synaema</i>        | 7.25  | 3.5  | 1  |
| <i>Synageles</i>      | 3.75  | 3    | 2  |
| <i>Tapinopa</i>       | 3.5   | 3.4  | 1  |
| <i>Tegenaria</i>      | 10.95 | 9.2  | 11 |
| <i>Tetragnatha</i>    | 8.11  | 6.68 | 8  |
| <i>Textrix</i>        | 6.5   | 6.5  | 3  |
| <i>Thanatus</i>       | 6.19  | 4.5  | 7  |
| <i>Theonoe</i>        | 1.13  | 1.13 | 1  |
| <i>Theridion</i>      | 2.82  | 2.39 | 22 |
| <i>Theridiosoma</i>   | 2.5   | 1.75 | 1  |
| <i>Thomisus</i>       | 6.5   | 3    | 1  |

|                   |       |      |    |
|-------------------|-------|------|----|
| <i>Tibellus</i>   | 9     | 7.5  | 2  |
| <i>Titanoeca</i>  | 4.75  | 4.13 | 2  |
| <i>Tmarus</i>     | 5.5   | 3.75 | 1  |
| <i>Trochosa</i>   | 11.88 | 9.63 | 4  |
| <i>Uloborus</i>   | 4.75  | 3.5  | 1  |
| <i>Xerolycosa</i> | 7.13  | 5.63 | 2  |
| <i>Xysticus</i>   | 7.46  | 4.83 | 17 |
| <i>Zelotes</i>    | 6.52  | 5.04 | 15 |
| <i>Zilla</i>      | 3.5   | 2.25 | 1  |
| <i>Zodarion</i>   | 3.62  | 2.52 | 3  |
| <i>Zora</i>       | 4.81  | 3.88 | 7  |
| <i>Zygiella</i>   | 5.88  | 4.06 | 5  |
